# Supplementary material
Source: publisher figshare collection journal article supplement (https://tandf.figshare.com/ndownloader/files/16191842)
Supplement: Supplementary file 1 [file 16191842]

**Appendix A. Product codes in WIOD**

P1 Products of agriculture hunting and related services

P2 Products of forestry logging and related services

P3 Fish and other fishing products services incidental of fishing

P4 Coal and lignite peat

P5 Crude petroleum and natural gas services incidental to oil a

P6 Uranium and thorium ores

P7 Metal ores

P8 Other mining and quarrying products

P9 Food products and beverages

P10 Tobacco products

P11 Textiles

P12 Wearing apparel furs

P13 Leather and leather products

P14 Wood and products of wood and cork except furniture articles

P15 Pulp paper and paper products

P16 Printed matter and recorded media

P17 Coke refined petroleum products and nuclear fuels

P18 Chemicals chemical products and man-made fibres

P19 Rubber and plastic products

P20 Other non-metallic mineral products

P21 Basic metals

P22 Fabricated metal products except machinery and equipment

P23 Machinery and equipment nec

P24 Office machinery and computers

P25 Electrical machinery and apparatus nec

P26 Radio, television and communication equipment and apparatus

P27 Medical precision and optical instruments watches and clocks

P28 Motor vehicles trailers and semi-trailers

P29 Other transport equipment

P30 Furniture other manufactured goods nec

P31 Secondary raw materials

P32 Electrical energy gas steam and hot water

P33 Collected and purified water distribution services of water

P34 Construction work

P35 Trade maintenance and repair services of motor vehicles and

P36 Wholesale trade and commission trade services except of moto

P37 Retail trade services except of motor vehicles and motorcycles

P38 Hotel and restaurant services

P39 Land transport and transport via pipeline services

P40 Water transport services

P41 Air transport services

P42 Supporting and auxiliary transport services travel agency se

P43 Post and telecommunication services

P44 Financial intermediation services except insurance and pensions

P45 Insurance and pension funding services except compulsory social

P46 Services auxiliary to financial intermediation

P47 Real estate services

P48 Renting services of machinery and equipment without operator

P49 Computer and related services

P50 Research and development services

P51 Other business services

P52 Public administration and defence services compulsory social

P53 Education services

P54 Health and social work services

P55 Sewage and refuse disposal services sanitation and similar s

P56 Membership organisation services nec

P57 Recreational cultural and sporting services

P58 Other services

P59 Private households with employed persons

**Appendix B. Plausibility of re-export redistribution**

### In order to get some sense of the reliability of our re-export matrices , we compared our results with existing information for the Netherlands. Statistics Netherlands provides information on the destination of Dutch re-exports.[[1]](#footnote-1) The information is based on customs data and company surveys. Hence, we have examined the correlation of the country pattern of re-exports (by product) from the Netherlands in the two data sets. The data from Statistics Netherlands are classified according the Standard International Trade Classification (SITC). The allocation of the WIOD product categories into SITC digit-1 groups has been somewhat crude due to the aggregation level of the data.[[2]](#footnote-2) We have merged SITC 0 and 1, and SITC 2 and 4, because product categories from WIOD could not clearly be assigned to one SITC category. Furthermore, the comparison is limited to goods trade only.

Figure B1 plots the shares (percentages) of destination countries in exports for the two datasets. The correlation between the two sets is quite high in chemicals and manufacturing (SITC 5, 6 and 8). In other words, re-exports from the Netherlands seem to be distributed across destinations consistently in both data sets. This evidence, however limited, does provide some credibility to our results.

Figure B1. Comparing distribution of Dutch re-exports across destinations with official statistics, in 2010


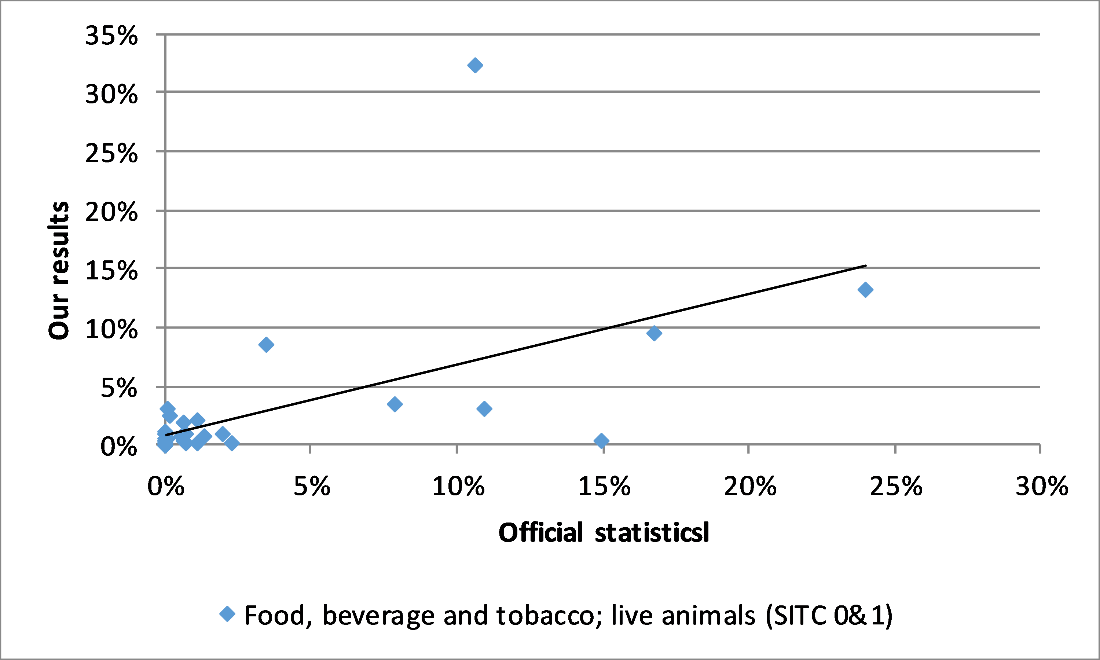


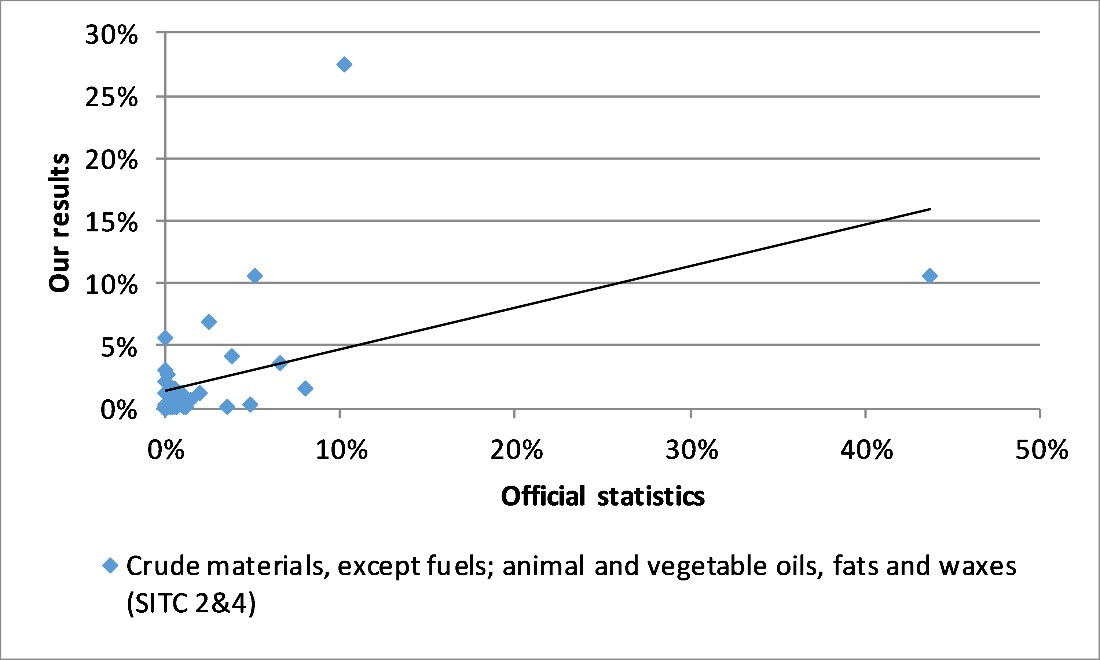


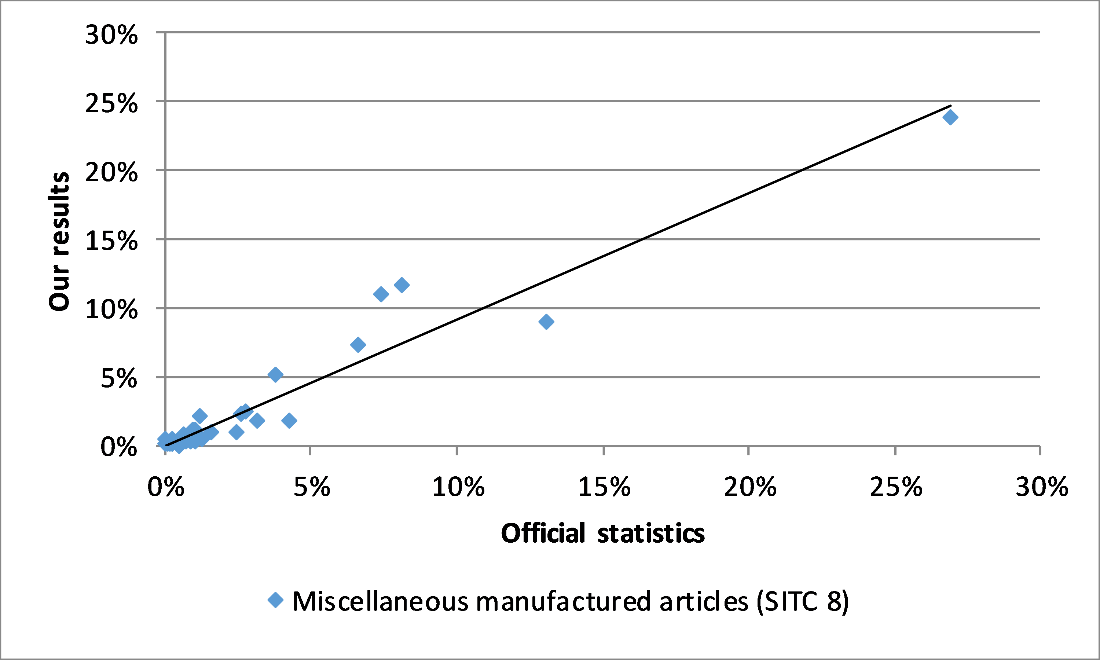

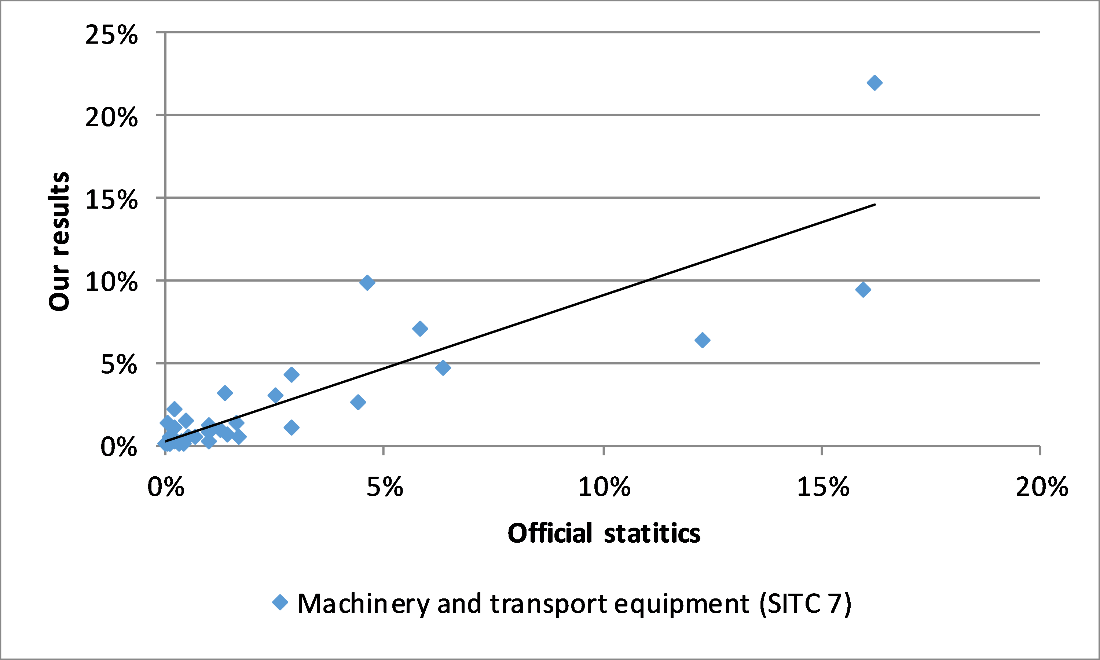

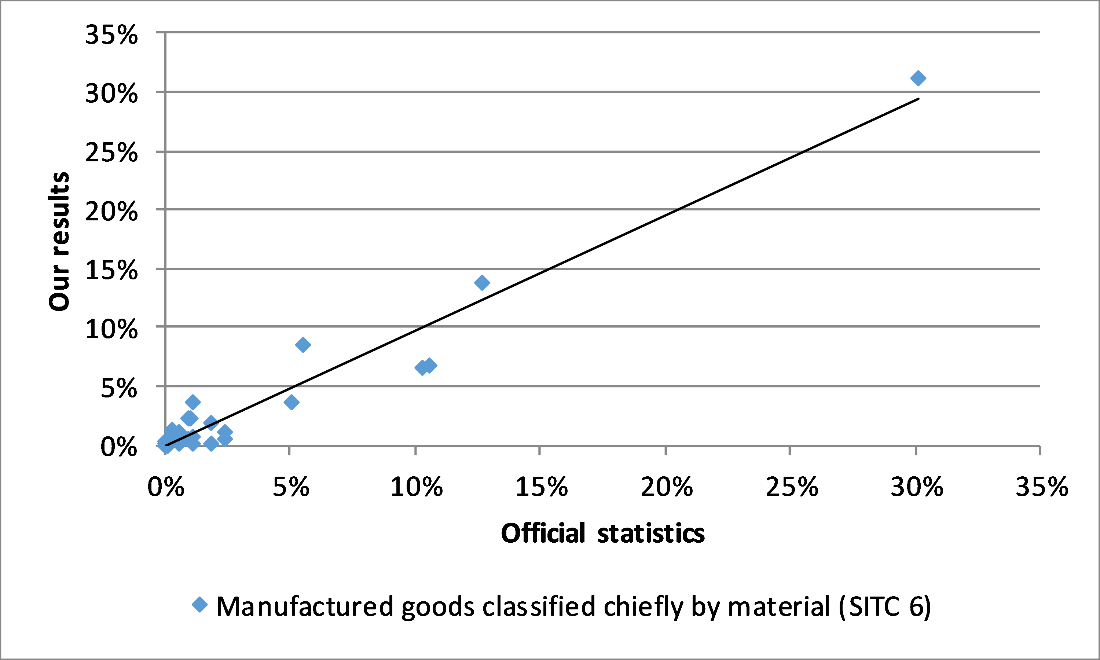

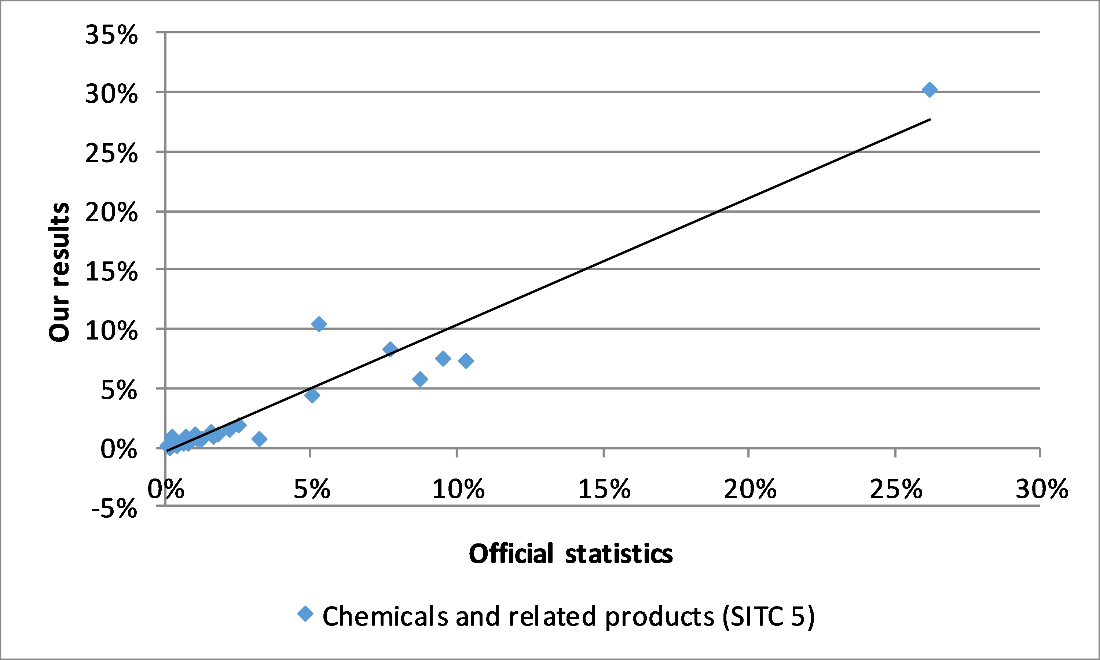


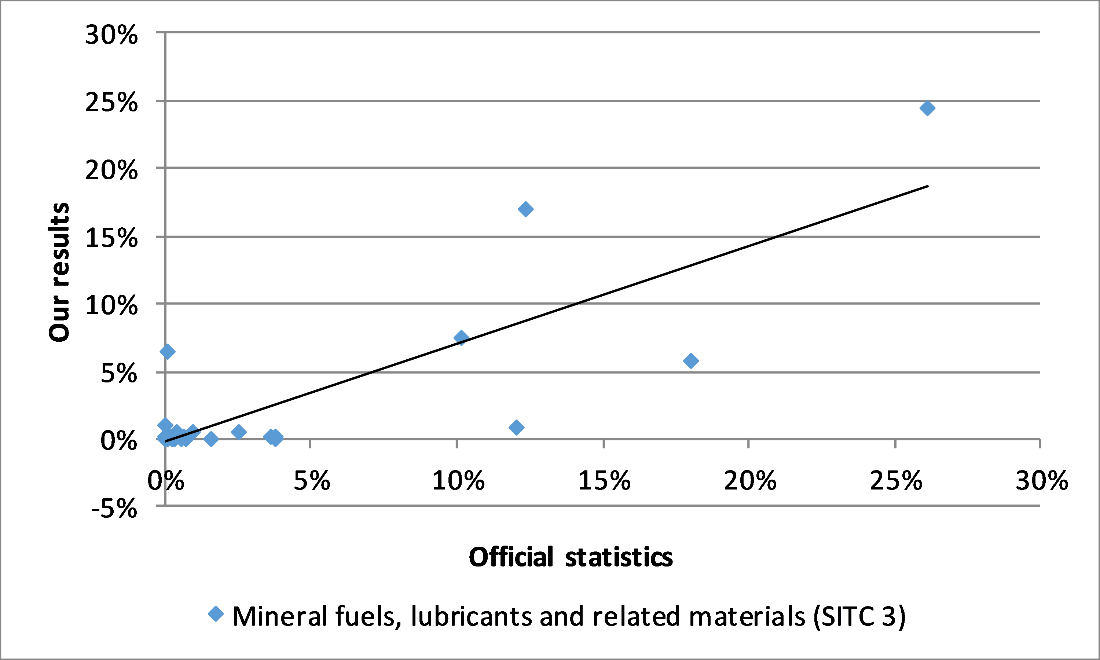


1. The data are available at <http://statline.cbs.nl/Statweb/publication/?DM=SLNL&PA=83028NED&D1=1-3&D2=a&D3=9-77&D4=116&VW=T> [↑](#footnote-ref-1)
2. WIOD registers product categories according to the European Statistical Classification of Products by Activity (CPA) 2002. [↑](#footnote-ref-2)
